# Supplementary material
Source: Springer Nature journal article supplement (https://www.springermedizin.de/resource/supplementary/12902_2012_123_MOESM4_ESM.pdf/9515594)
Supplement: MOESM4 [file 9515594]

# Cardiovascular death

|                      | Statistics for each study |             |             |         |
|----------------------|---------------------------|-------------|-------------|---------|
|                      | Odds ratio                | Lower limit | Upper limit | p-Value |
| Barrett-Connor, 1987 | 1.00                      | 0.90        | 1.11        | 1.00    |
| Bass, 1993           | 6.92                      | 3.40        | 14.08       | 0.00    |
| Chan, 2005           | 2.97                      | 1.00        | 8.80        | 0.05    |
| Eberly, 2003         | 1.26                      | 0.99        | 1.61        | 0.06    |
| Ellingsen, 2003      | 1.43                      | 0.88        | 2.31        | 0.15    |
| Mazza, 2005          | 2.45                      | 1.48        | 4.05        | 0.00    |
| Tanko, 2005          | 3.10                      | 1.40        | 6.86        | 0.01    |
| Tsai, 2008           | 1.08                      | 0.78        | 1.50        | 0.64    |
| Weir, 2003           | 1.95                      | 1.44        | 2.63        | 0.00    |
|                      | 1.80                      | 1.31        | 2.49        | 0.00    |

Odds ratio and 95% CI

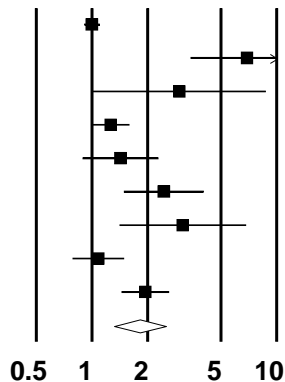

Decreased risk with hypertriglyceridemia

Increased risk with hypertriglyceridemia
